1 **Title:**

2 *A studyforrest* extension, MEG recordings while watching the audio-visual movie  
3 “Forrest Gump”

4

5 **Authors:** Xingyu Liu<sup>1</sup>, Yuxuan Dai<sup>1</sup>, Hailun Xie<sup>1</sup>, Zonglei Zhen<sup>1,2</sup>

6

7 **Affiliation:**<sup>1</sup>Beijing Key Laboratory of Applied Experimental Psychology, National  
8 Demonstration Center for Experimental Psychology Education, Faculty of  
9 Psychology, Beijing Normal University, Beijing, China. <sup>2</sup>State Key Laboratory of  
10 Cognitive Neuroscience and Learning & IDG/McGovern Institute for Brain Research,  
11 Beijing Normal University, Beijing, China.

12

13 **Correspondence address:** Zonglei Zhen, Ph.D. (zhenzonglei@bnu.edu.cn), Faculty  
14 of Psychology, Beijing Normal University, Beijing, 100875, China.

15

16 **Acknowledgements:** This study was funded by the National Key R&D Program of  
17 China (Grant No. 2019YFA0709503), and the National Natural Science Foundation of  
18 China (Grant No. 31771251).

19

20 **Conflict of Interest:** None declared.

21

22 **Abstract**

23           Naturalistic stimuli, such as movies, are being increasingly used to map brain  
24 function because of their high ecological validity. The pioneering *studyforrest* and  
25 other naturalistic neuroimaging projects have provided free access to multiple movie-  
26 watching functional magnetic resonance imaging (fMRI) datasets to prompt the  
27 community for naturalistic experimental paradigms. However, sluggish blood-  
28 oxygenation-level-dependent fMRI signals are incapable of resolving neuronal  
29 activity with the temporal resolution at which it unfolds. Instead,  
30 magnetoencephalography (MEG) measures changes in the magnetic field produced by  
31 neuronal activity and is able to capture rich dynamics of the brain at the millisecond  
32 level while watching naturalistic movies. Herein, we present the first public prolonged  
33 MEG dataset collected from 11 participants while watching the 2 h long audio-visual  
34 movie “Forrest Gump”. Minimally preprocessed data was also provided to facilitate  
35 the use. As a *studyforrest* extension, we envision that this dataset, together with fMRI  
36 data from the *studyforrest* project, will serve as a foundation for exploring the neural  
37 dynamics of various cognitive functions in real-world contexts.

38

## 39 **Background & Summary**

40           The mechanisms of human brain function in complex dynamic environments is  
41 the ultimate mystery that cognitive neuroscience aspires to quest. Most of the existing  
42 models on brain function have been obtained from tightly controlled experimental  
43 manipulations on carefully designed “artificial” stimuli. However, these simple  
44 stimuli are often irrelevant to ecological scenarios encountered in real-world  
45 environments, in terms of quantity, complexity, modality, and dynamics. To address  
46 this issue, naturalistic stimuli that encode a wealth of real-life content have become  
47 increasingly popular for understanding brain function in ecological contexts.  
48 Researchers have achieved significant advances in the areas of human memory,  
49 attention, language, emotions, and social cognition using naturalistic stimuli (for  
50 recent reviews, please refer to Sonkusare et al., 2019<sup>1</sup> and Jääskeläinen et al., 2021<sup>2</sup>).  
51 Simultaneously, emerging deep learning technologies that could afford multiple levels  
52 of representations for naturalistic stimuli are continuously expanding the application  
53 of naturalistic stimuli for exploring human brain function<sup>3-6</sup>.

54           Notably, owing to its dynamics and multimodal content, movies have been  
55 successfully utilized as naturalistic stimuli to examine the mechanism by which the  
56 brain processes diverse psychological constructs and dynamic interactions. Functional  
57 magnetic resonance imaging (fMRI) is commonly employed to measure brain activity  
58 while watching a movie. In particular, the pioneering *studyforrest* and other  
59 naturalistic neuroimaging projects have released multiple fMRI datasets collected  
60 from participants who watched movie clips<sup>7-11</sup>. However, fMRI measures the  
61 relatively sluggish blood-oxygenation-level-dependent signal, therefore falling short  
62 of characterizing the complex neural dynamics underlying the cognitive processing of  
63 dynamic movies. In contrast, magnetoencephalography (MEG) measures the magnetic  
64 fields generated by neuronal activity on a millisecond time scale. Thus, it has great  
65 potential to pry open neural dynamics in processing naturalistic stimuli. Several  
66 studies have leveraged MEG to investigate brain activity for naturalistic movie stimuli  
67 in a short period ( $\leq 20$  min)<sup>12-16</sup>. So far, however, there is still a dearth of publicly  
68 accessible MEG recordings for naturalistic stimuli, especially prolonged MEG  
69 recordings for dynamic movies that are more likely to capture the  
70 temporal dynamics of regular functional brain states that occur in everyday life, and  
71 further contribute to unraveling human brain function in ecological contexts.

72           Herein, we present an MEG dataset obtained while watching the 2 h long  
73 audio-visual movie “Forrest Gump” (R. Zemeckis, Paramount Pictures, 1994). The  
74 recordings measure brain activation with a temporal resolution at the millisecond  
75 level, thus providing a timely and efficient extension to the *studyforrest* dataset.  
76 Specifically, MEG data were collected from 11 participants while they were watching  
77 the Chinese-dubbed movie “Forrest Gump” in eight consecutive runs, each lasting for  
78 roughly 15 min. High-resolution structural MRI was additionally acquired for all  
79 participants, thereby allowing the incorporation of the detailed anatomy of the brain  
80 and head in the source localization of MEG signals. Together with the raw data,  
81 preprocessed MEG and MRI data with standard pipelines were also provided to  
82 facilitate the use of the data. Considering MEG and fMRI are complementary to each  
83 other, synergy between our present MEG recordings and fMRI data from the  
84 *studyforrest* project will serve as a front to elaborate brain function in the wild. We  
85 believe the dataset is suitable for addressing many questions pertaining to the neural  
86 dynamics of various aspects, including perception, memory, language, and social  
87 cognition.

## 88 **Methods**

### 89 **Participants**

90           A total of 11 participants (mean  $\pm$  SD age:  $22 \pm 1.7$  years, 6 female) from the  
91 Beijing Normal University, Beijing, China, volunteered for this study. They  
92 completed both the MEG and MRI sessions. All participants were right-handed native  
93 Chinese speakers, with normal hearing and normal or corrected-to-normal vision.  
94 None of them had ever watched the film “Forrest Gump” before, except one who had  
95 watched some clips, however not the entire movie. Of the 10 participants, four had  
96 heard about the movie plot, while others did not. The study was approved by the  
97 Institutional Review Board of the Faculty of Psychology, Beijing Normal University.  
98 Written informed consent was obtained from all participants, prior to their  
99 participation. All participants provided additional consent for sharing their  
100 anonymized data for research purposes.

### 101 **Procedures**

102           Fig. 1 depicts the overall flow of data collection and preprocessing. Prior to  
103 data acquisition, all participants completed a questionnaire on their demographic

104 information and familiarity with the movie “Forrest Gump”. The data acquisition  
105 consisted of two sessions for each participant, namely one MEG session to record  
106 their neural activities during movie watching and an MRI session with a T1-weighted  
107 (T1w) scan to measure the brain structure for the spatial localization of the MEG  
108 signal. The MRI scan immediately followed the MEG session for all participants,  
109 except for sub-07 and sub-11, who finished their MRI session a week later.  
110

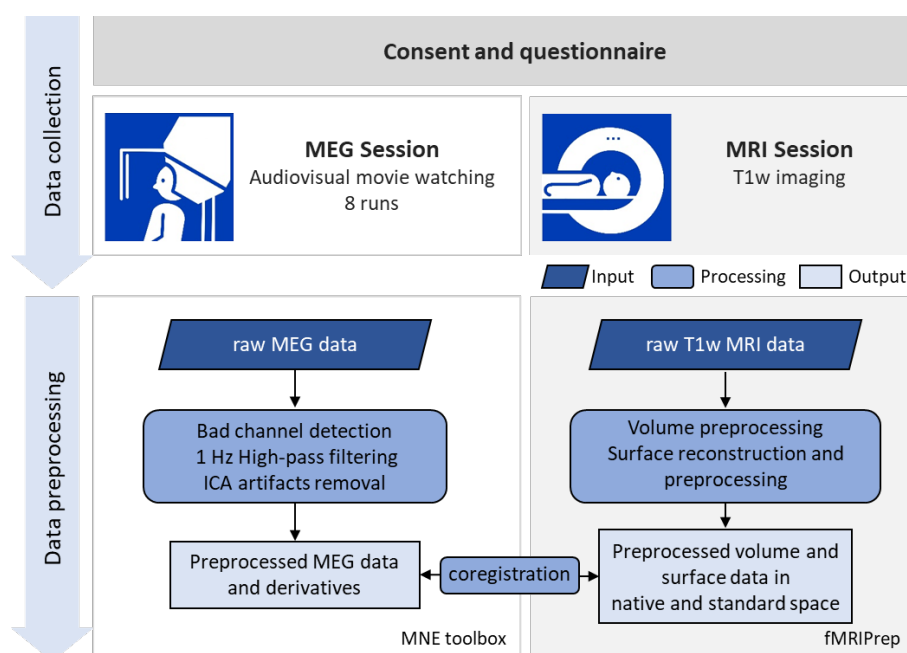

111

112 **Fig. 1. Schematic of the data collection and preprocessing procedure.** Data  
113 collection comprised one MEG session, followed by one MRI session. The  
114 neuromagnetic signals were recorded with a whole-scalp-covering MEG while the  
115 participants watched the audio-visual movie “Forrest Gump”. An anatomical T1w  
116 imaging was acquired in the MRI session. The raw MEG data and MRI data were  
117 preprocessed with MNE and fMRIPrep toolbox, respectively. The MEG-MRI  
118 coregistration was performed on the preprocessed data.

### 119 **Stimulus material and presentation**

120 The audio-visual stimuli were generated from the Chinese-dubbed “Forrest  
121 Gump” DVD, released in 2013 (ISBN: 978-7-7991-3934-0). The movie was split into  
122 eight segments, each of which lasted for approximately 15 min. The stimuli were  
123 initially obtained by concatenating all original VOB files from the DVD release into  
124 one MPEG-4 file, using FFmpeg (<https://ffmpeg.org>). The concatenated MPEG-4 file  
125 contained a video stream and a Chinese-dubbed audio stream, which was down-mixed  
126 from multi-channel to 2Channel stereo. The stimuli were then divided into eight

127 segments using Adobe Premier software (Adobe Premiere Pro CC 2017, Adobe, Inc.,  
 128 San Jose, CA, USA). Each segment conformed to the following specifications: video  
 129 codec=avc1, display aspect ratio=4:3, resolution=1024×768 pixels, frame rate=25  
 130 FPS, color space=YUV, video bit depth=8 bits, audio codec=mp4a-40-2, audio  
 131 sampling rate=48.0 kHz, and audio channels=2. Each successive segment began with  
 132 a 4 s repetition of the end of the previous segment. It should be noted that the Chinese-  
 133 dubbed “Forrest Gump” was slightly abridged than the German version. To align with  
 134 the stimuli of the *studyforrest* dataset as much as possible, a short clip from the  
 135 German-dubbed DVD released in 2011 (EAN: 4010884250916) was added to our  
 136 stimuli. Table 1 summarizes the alignment of the stimuli sources from both the  
 137 Chinese and German versions.

138

| Segment | Frames | Duration | Start (cn) | End (cn) | Start (de) | End (de) |
|---------|--------|----------|------------|----------|------------|----------|
| 1       | 22499  | 15:00.07 | 63         | 22562    | 35         | 22534    |
| 2       | 22599  | 15:04.08 | 22463      | 32374    | 22438      | 32349    |
|         |        |          | 36410      | 49098    | 36385      | 49073    |
| 3       | 22599  | 15:04.08 | 48999      | 57860    | 48974      | 57835    |
|         |        |          | 58531      | 63717    | 58506      | 63692    |
|         |        |          | -          | -        | 63692      | 64621    |
|         |        |          | 63718      | 71341    | 64621      | 72244    |
| 4       | 22599  | 15:04.08 | 71242      | 85132    | 72146      | 86036    |
|         |        |          | 88427      | 97136    | 89332      | 93902    |
| 5       | 22599  | 15:04.08 |            |          | 94464      | 98603    |
|         |        |          | 97037      | 111719   | 98504      | 105793   |
|         |        |          |            |          | 109959     | 117352   |
|         |        |          | 115101     | 118317   | 120733     | 123949   |
| 6       | 22599  | 15:04.08 | 118797     | 123498   | 125347     | 130048   |
|         |        |          | 123398     | 145602   | 129948     | 152152   |
| 7       | 22599  | 15:04.08 | 147736     | 148131   | 154286     | 154681   |
|         |        |          | 148032     | 170631   | 154582     | 177181   |
| 8       | 17661  | 11:46.56 | 170532     | 188193   | 177082     | 194743   |

139

140 **Table 1. Timing alignment for stimuli from the Chinese (cn) and German (de)**  
 141 **version of “Forrest Gump”.** The start time and end time are different for the same  
 142 movie clip in the two versions. Moreover, a clip with only background sound stream  
 143 from the German version (frames from 63692 to 64621) was added into the third  
 144 segment.

145

146 The visual stimuli were projected onto a screen in full-screen mode from a  
 147 DLP projector with 1024×768-pixel resolution, using Psychophysics Toolbox Version  
 148 3<sup>17</sup> in MATLAB 2016 (The MathWorks, Inc., Natick, Massachusetts, USA). The  
 149 participants watched the visual stimuli on a rear projection screen through mirror  
 150 reflection (visual field angles=31.17°×23.69°; viewing distance=751 mm). The audio

151 stimuli were delivered to the participants using foam ear-tips connected to a  
152 loudspeaker via an air-conducting tube. The average delay of the peripheral devices  
153 was 33 ms and 15 ms for the visual and audio displays, respectively. The participants  
154 were instructed to watch the movie, without other tasks and keep still as best as  
155 possible.

### 156 **MEG data acquisition**

157 MEG data were recorded using a 275-channel whole-head axial gradiometer  
158 DSQ-3500 MEG system (CTF MEG, Canada) at the Institute of Biophysics, Chinese  
159 Academy of Sciences, Beijing, China. Three channels (i.e., MLF55, MRT23 and  
160 MRT16) were out of service due to failure of sensors. The neuromagnetic signals were  
161 recorded in continuous mode at a sampling rate of 600 Hz, without online digital band  
162 filters. A third-order synthetic gradiometer was employed to remove far-field noise.  
163 The precise timing of each frame was recorded. Upon presenting each frame to the  
164 participants, we recorded a trigger pulse lasting for five samples in the stimuli channel  
165 UPPT001, along with the MEG signals. The beginning of the movie was indicated  
166 with a value of 255. Owing to the limited bit-width of the stimuli channel, the frame  
167 number was unable to be marked with an accurate value  $> 20,000$ . The frame numbers  
168 were therefore marked as the ceiling of the timestamp of that frame divided by 10,  
169 resulting in step-like increasing marker values with a step width of 10 s.

170 At the beginning of each session, three HPI coils were attached to the  
171 participants' nasion (NAS), left preauricular (LPA), and right preauricular (RPA)  
172 points to continuously measure their head position during the MEG dewar. A  
173 customized wooden chin-rest supporter was introduced to prevent possible head  
174 movements. The MEG session consisted of eight runs, with each run playing one  
175 movie segment. Eight segments were played chronologically. The participants took a  
176 self-paced break between runs. Following the completion of the MEG scan, the  
177 participants underwent an anatomical T1w scan. The HPI coils were replaced with  
178 three customized MRI-compatible vitamin E caplets in the MRI scan to provide  
179 spatial reference for the spatial alignment between the MEG and MRI data.

180

## 181 MEG data preprocessing

182 MEG data processing was performed offline using the MNE-Python  
183 package<sup>18</sup>. The MEG preprocessing pipeline was conducted at the run level (Fig. 1).  
184 First, the bad channels were detected and marked. As a result, no bad channels were  
185 identified in all acquisitions except two in run-05 of sub-05. Second, a high-pass filter  
186 of 1 Hz was applied to remove possible slow drifts from the continuous MEG data  
187 (Fig. 2a). Finally, artifact removal was performed using an independent component  
188 analysis (ICA). The number of independent components (IC) was set to 20. Two raters  
189 (i.e., X.L. and Y.D.) manually identified the head movement, eye movement, eye  
190 blinks, and cardiac artifacts (Fig. 2b). On average, 3.21 ICs (SD: 0.85) were classified  
191 as artifacts. The denoised MEG data were eventually reconstructed from all the non-  
192 artifact components and residual components (Fig. 2c). Both the raw and preprocessed  
193 data were provided in the released dataset.  
194

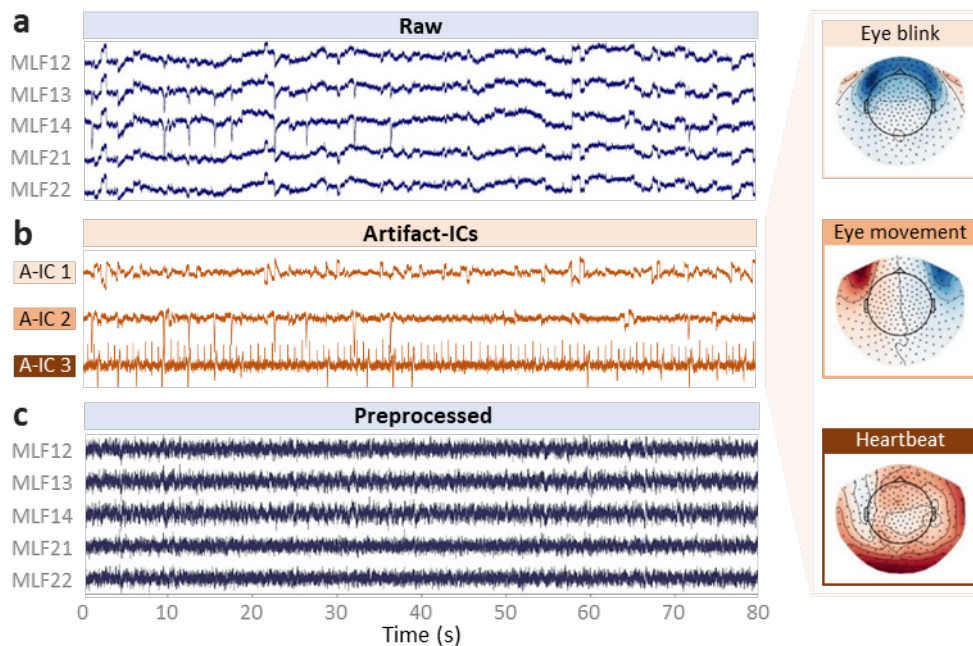

195  
196 **Fig. 2. Typical artifact-ICs and MEG signals from the pre- and post-**  
197 **preprocessing data. (a)** MEG signals of example channels from the raw (i.e. pre-  
198 preprocessing) data. **(b)** Timeseries and scalp field distribution of three typical  
199 artifact-ICs (A-ICs), namely A-IC 1 for eye blink, A-IC 2 for horizontal eye  
200 movement, and A-IC 3 for heartbeat. **(c)** MEG signals of example channels from the  
201 preprocessed data. Data from the run-04 of sub-04 was used for this illustration.



## 202 **MRI data acquisition and preprocessing**

203 High-resolution anatomical MRI was collected for each participant using a 3T  
204 SIEMENS Prisma<sup>fit</sup> scanner (Siemens Healthcare GmbH, Erlangen, Germany), with a  
205 20-channel headneck coil. All participants underwent a T1w scan with a 3-D  
206 magnetization-prepared rapid gradient-echo pulse sequence with identical parameters  
207 (TR=2530 ms, TE=1.26 ms, TI=1100 ms, flip-angle=7°, 176 sagittal slices, slice  
208 thickness=1 mm, matrix size=256 × 256, and voxel size=1.0 × 1.0 mm), except that  
209 sub-01 was scanned with slightly different parameters (TR=2200 ms, TE=3.37 ms,  
210 TI=1100 ms, flip-angle=7°, 192 sagittal slices, slice thickness=1 mm, matrix  
211 size=224×256, and voxel size=1.0 × 1.0 mm). Earplugs were used to attenuate the  
212 scanner noise. A foam pillow and extendable padded head clamps were applied to  
213 restrain the head motion.

214 The raw DICOM files of T1w images to NIFTI files using dcm2niix  
215 (<https://github.com/rordenlab/dcm2niix>). The T1w images were then minimally  
216 preprocessed using the anatomical preprocessing pipeline from fMRIPrep 20.2.1, with  
217 default settings<sup>19</sup>. In brief, the T1w data were skull-stripped and corrected for intensity  
218 nonuniformity with ANTs and N4ITK<sup>20</sup>. Brain surfaces were reconstructed using  
219 FreeSurfer<sup>21</sup>. Spatial normalization to both MNI152NLin6Asym and  
220 MNI152NLin2009cAsym was performed through nonlinear registration with ANTs,  
221 using the brain-extracted versions of both T1w volume and template.

## 222 **MEG-MRI coregistration procedure**

223 To reconstruct the source of MEG sensor signals, MEG data were co-  
224 registered with the high-resolution anatomical T1w MRI data for each participant. The  
225 NAS, LPA, and RPA points marked in both MEG and MRI sessions were used as  
226 fiducial points for the alignment of the MEG and MRI data. Specifically, following  
227 the generation of a high-resolution head surface using MNE make\_scalp\_surfaces  
228 based on FreeSurfer reconstruction, we performed MEG-MRI coregistration for each  
229 participant in the MNE COREG GUI<sup>18</sup>. First, the three fiducial points were manually  
230 pinned on the MRI-reconstructed head surface. an iterative algorithm (nearest-  
231 neighbor calculations) was then ran to align the MEG and MRI coordinates. The co-  
232 registration was refined by manual adjustment. The results showed that the averaged  
233 distances between the three fiducials in the coregistered MEG and MRI coordinate  
234 systems were 0.96 mm, 4.22 mm, and 4.90 mm for NAS, LPA, and RPA respectively.

235 Both the MRI-fiducials files and MEG-MRI coordinate transformation files were  
236 included in the released data.

### 237 Data Records

238 The dataset can be accessed at OpenNeuro (dataset accession number:  
239 ds003633, version 1.0.1, <https://openneuro.org/datasets/ds003633/versions/1.0.1>)<sup>22</sup>.  
240 The facial information was removed from the published dataset using pydeface  
241 (<https://github.com/poldracklab/pydeface>) to ensure anonymity. The data was  
242 organized according to the MEG-Brain Imaging Data Structure (MEG-BIDS)<sup>23</sup> using  
243 the MNE-BIDS toolbox<sup>24</sup> (Fig. 3). Besides dataset and participant description files,  
244 the data were sorted into different directories, including “sub-<participant\_id>,”  
245 “derivatives,” and “code” directory for raw data from each participant, preprocessed  
246 data, and the code used for stimuli preparation and presentation, data preprocessing,  
247 respectively (Fig. 3a).  
248

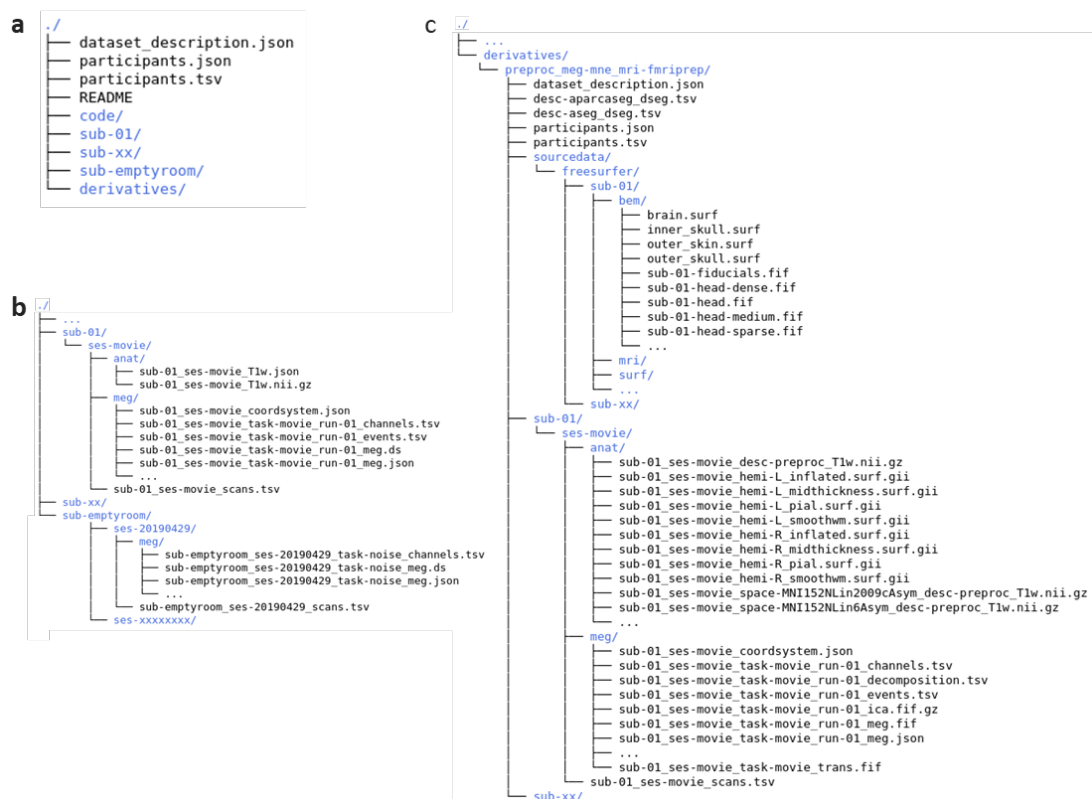

249

250 **Fig. 3. The file structure of the dataset. (a)** File structure of the project directory. **(b)**  
251 File structure of the raw data for each individual participant. **(c)** File organization of  
252 the derived (preprocessed) data.

253

## 254 **Raw data**

255           The raw data of each participant were stored separately in the “sub-  
256 <participant\_id>” folders (Fig. 3b), consisting of two subfolders, namely “anat” and  
257 “meg”. The T1w MRI data (“\*T1w.nii.gz”) and associated sidecar json files were  
258 located in the “anat” folders. The raw MEG data were provided as CTF ds files  
259 (“\*\_meg.ds”) for each run, and located in the “meg” folder along with sidecar json  
260 files. In addition, “\*\_channel.tsv” files with MEG channel information, “\*\_events.tsv”  
261 files with the presentation timing of stimuli frames and “\*coordsystem.json” files with  
262 coordinate system information of the MEG sensors were included in the “meg” folder.

263           In parallel with the “sub-<participant\_id>” directories, a “sub-emptyroom”  
264 directory hosted empty-room MEG measurements, which recorded the environmental  
265 noise of the MEG system. The empty-room measurements lasted for 34 s and were  
266 acquired on each data acquisition day, except for the day 20190603.

## 267 **Preprocessed data**

268           All preprocessed data were deposited in the “preproc\_meg-mne\_mri-fmriprep”  
269 subdirectory under the “derivatives” (Fig. 3c). The preprocessed data of each  
270 participant were separately saved in the “sub-<participant\_id>/ses-movie” directory,  
271 which contains two subfolders, namely “anat” and “meg”. The “anat” folder  
272 comprised the preprocessed MRI volume, reconstructed surface, and other  
273 associations, including transformation files. The “meg” folder included preprocessed  
274 MEG recordings, including “\*\_meg.fif.gz”, “\*\_ica.fif.gz” and “\*\_decomposition.tsv”,  
275 and “\*\_trans.fif” for the preprocessed data, ICA decomposition, and MEG-MRI  
276 coordinate transformation, respectively. In addition, the FreeSurfer surface data, the  
277 high-resolution head surface (“freesurfer/sub-<participant\_id>/bem/\*”), and the MRI-  
278 fiducials (“freesurfer/sub-<participant\_id>/bem/\*fiducials.fif”) were provided in  
279 “freesurfer/sourcedata” directory for MEG-MRI coregistration.

## 280 **Technical Validation**

281           We assessed the data quality of both the raw and preprocessed data using four  
282 measures as follows: head motion magnitude, stimuli-induced time-frequency  
283 characteristics, homotopic functional connectivity (FC), and inter-subject correlation  
284 (ISC).

## 285 Motion magnitude distribution

286 Head movements during MEG scans are one of the significant factors that  
287 degrade both sensor- and source-level analyses. Herein, we calculated the motion  
288 magnitude for each sample as the Euclidian distance between the current and the  
289 initial head position while the movie segment began playing. The head motion across  
290 all runs and all participants were summarized for each of the three fiducials (NAS,  
291 LPA, and RPA) to provide an overview of the head movement of the dataset. As show  
292 in Fig. 4, motion magnitude of 95% of the samples had head motions lower than 3.43  
293 mm, 4.11 mm, and 3.87 mm for NAS, LPA, and RPA, respectively. Furthermore, 50%  
294 of the samples had head motions smaller than 0.99 mm, 1.10 mm, and 1.46 mm for  
295 NAS, LPA, and RPA, respectively. These findings indicated low head motion  
296 magnitude on average. The head motion magnitude of each participant could be found  
297 in Supplementary Fig. 1.

298

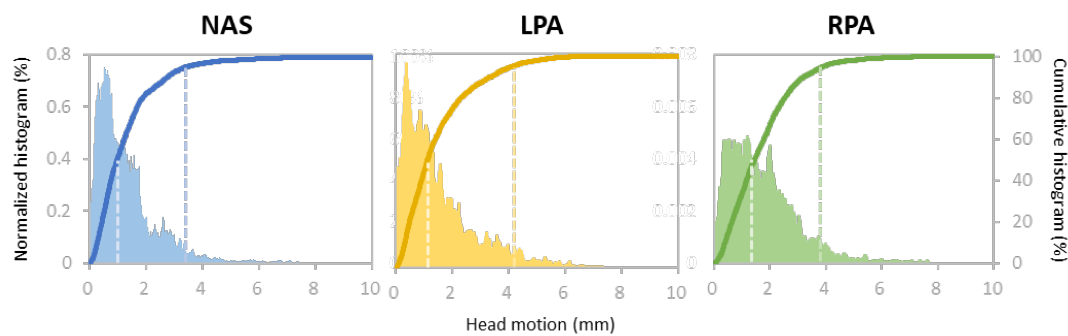

299

300 **Fig. 4. The ensemble distribution of head motion magnitude across all runs and**  
301 **all participants.** The density and accumulative histogram of motion magnitude of all  
302 samples from all acquisitions for three fiducials (NAS, LPA, and RPA) have been  
303 plotted. The dashed lines indicate the 50% and 95% of the cumulative density. Left Y-  
304 axis: normalized histogram; Right Y-axis: cumulative histogram.

305

## 306 Time-frequency characterization of brain activity

307 Herein, we validated whether MEG recordings could successfully detect the  
308 change in stimuli-induced brain activity. Because the movie stimuli do not have  
309 explicit condition structures as in conventional design, we selected two exemplar  
310 movie clips, within which the audio or visual features showed pronounced changes to  
311 examine if the expected change in MEG signals could be detected at the related  
312 sensors. In one clip (Seg 3: frame  $15864 \pm 125$ ), the audio features changed

313 significantly (a vocal voice developed from background music) whereas the visual  
314 features were stable. In contrast, the other clip (Seg 1: frame  $21768 \pm 125$ ) comprised  
315 stable audio features, whereas the visual features changed from landscape to human  
316 figures. Validation was performed according to the following procedure<sup>25–27</sup>: First,  
317 time-frequency analysis with Morlet wavelets was conducted for each sensor in the  
318 occipital and temporal lobes. The baseline was set to 1000 ms before the change  
319 points of the audio or visual features, and the baseline mean was subtracted for each  
320 channel. Second, the time-frequency representations were averaged across the  
321 participants. Finally, the time-frequency representations were averaged across the  
322 sensors from the occipital and temporal lobes, respectively. As shown in Fig. 5, the  
323 time-frequency representations from the occipital sensors, and not the temporal  
324 sensors, were locked with changes in visual features. The opposite pattern was  
325 observed for the audio feature changes in the stimuli. The results demonstrated that  
326 current MEG data could accurately detect stimulus-induced brain activity.  
327

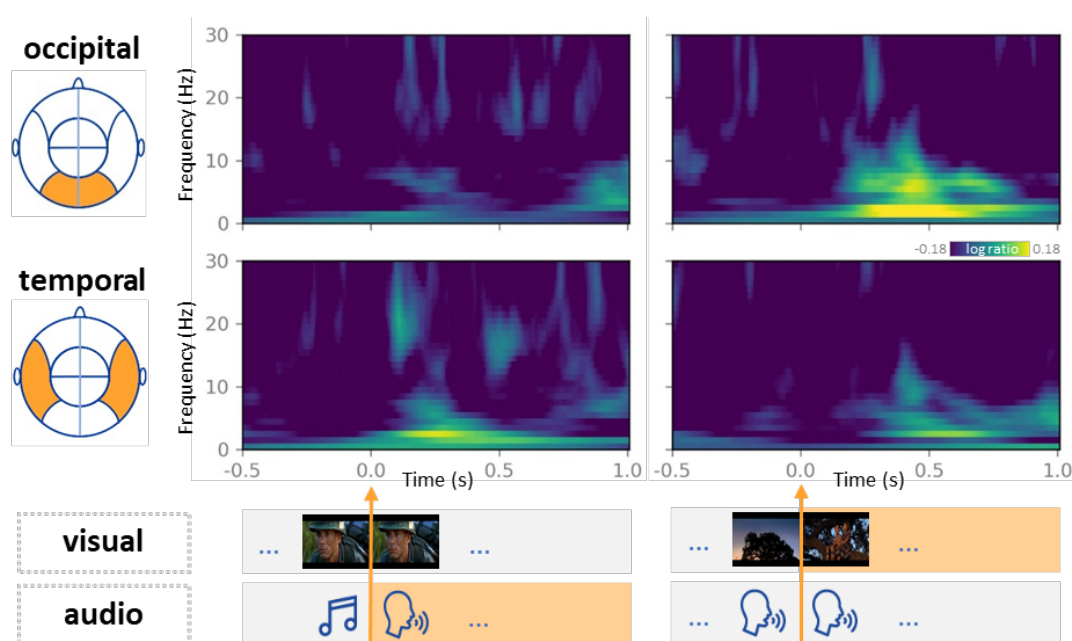

328

329 **Fig. 5. Time-frequency characterization of the brain activity for stimuli.** MEG  
330 signals from two movie clips with pronounced changes in either audio or visual  
331 features of the stimuli have been examined. The occipital sensors (top) display  
332 significant signal changes with a change in the visual features of the stimuli. The  
333 temporal sensors (bottom) display significant changes with a change in the audio  
334 features.

335

### 336 Homotopic functional connectivity

337 A basic principle of the brain's functional architecture is that FC between  
338 inter-hemispheric homologs (i.e., homotopic regions) is particularly stronger than  
339 other interhemispheric (i.e., heterotopic) FC<sup>28,29</sup>. Herein, we tested if MEG data for  
340 dynamic movies at the sensor level could reveal strong homotopic FC. First, we  
341 calculated the absolute envelope amplitude of the MEG signal from each sensor via  
342 the Hilbert transform and down-sampled to 1 Hz. Second, the sensor-level homotopic  
343 FC was calculated using Pearson's correlation between the envelope amplitude of  
344 each homotopic sensor pair. For comparison, the heterotopic FC was also calculated  
345 for each sensor as the average correlation between all heterotopic sensor pairs. Finally,  
346 the homotopic and heterotopic FC values were averaged across all runs and all  
347 participants. The homotopic sensors expectedly revealed stronger FC than the  
348 heterotopic sensor pairs (Fig. 6a). Moreover, the high homotopic FC primarily  
349 appeared at the sensors located in the occipital and temporal cortices, thereby  
350 indicating strong couplings driven by the movie stimuli (Fig. 6b).

351

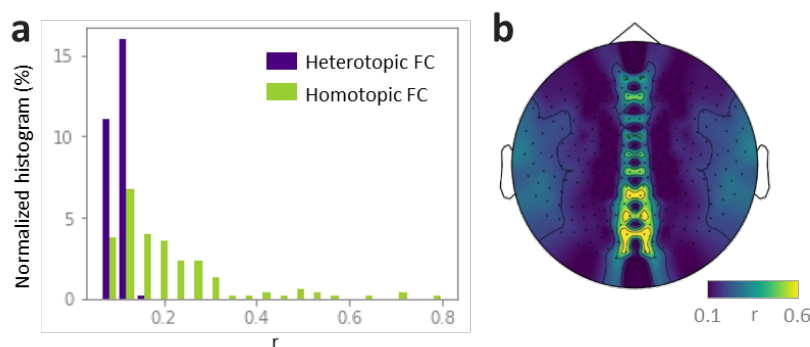

352

353 **Fig. 6. The sensor-level homotopic functional connectivity (FC) is stronger than**  
354 **the heterotopic FC. (a)** The histogram of the sensor-level homotopic FC and  
355 heterotopic FC pooled across all runs and participants. **(b)** The topographic map of the  
356 sensor-level homotopic FCs averaged across all acquisitions. Identical homotopic FC  
357 values are displayed for the corresponding homotopic sensors from the two  
358 hemispheres. Sensors in the central axis with no corresponding homotopic sensors  
359 were not included in the analysis.

360

### 361 Inter-subject correlation

362 ISC analysis uses the brain responses of a subject to naturalistic stimuli as a  
363 model to predict the brain responses of other subjects<sup>30</sup>. Numerous studies have

364 demonstrated that visual and auditory cortices display significant ISC while watching  
365 audio-visual movies. We validated if a high ISC could be detected in our MEG data.  
366 For simplicity, the ISC analysis was conducted at the sensor-level. The MEG  
367 recordings captured neural oscillations at different frequency bands<sup>31</sup>. Therefore, the  
368 ISC was calculated in five bands (delta: 1-4 Hz, theta: 4-8 Hz, alpha: 8-13 Hz, beta:  
369 13-30 Hz, and gamma: 30-100 Hz). First, the MEG signal was filtered for each band.  
370 Second, the absolute envelope amplitude of each band was calculated via the Hilbert  
371 transform and down-sampled to 1 Hz. Third, for each frequency band, a leave-one-  
372 participant-out ISC was calculated for the left participant as the temporal correlation  
373 between the envelope amplitude from the participant and the average of other  
374 participants. Finally, the mean ISC was calculated by averaging the ISC across all  
375 participants. As shown in Fig. 7, sensors with higher ISC were located near the visual  
376 and audio cortices, which reportedly displayed high ISC during movie watching in  
377 previous studies<sup>14,32-34</sup>. In particular, the high ISC predominantly occurred in the delta,  
378 theta, and alpha bands, consistent with previous studies<sup>14,33,34</sup>. Together, the dataset  
379 demonstrated good validity in detecting ISC. In addition, a high ISC was observed in  
380 the orbital frontal area in the raw data, likely caused by eye blink or movement  
381 considering that high ISC was not observed in the preprocessed data, in which the  
382 artifacts have been removed.

383

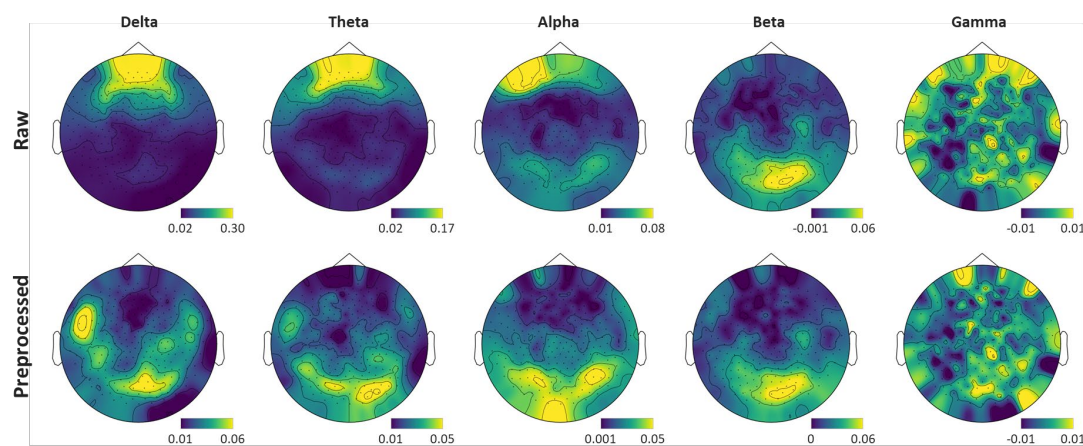

384

385

386 **Fig. 7. Topographic maps of ISC in different frequency bands derived from both**  
387 **the raw and preprocessed MEG data.** A high ISC occurs near the visual and  
388 audio cortices in the delta, theta and alpha bands for both the raw (top)  
389 (bottom) MEG data. A high orbital frontal ISC is only observed in the raw data, likely  
390 caused by artifacts.

391

## 392 Usage Notes

393 We presented the first public MEG dataset for a full-length movie. The MEG  
394 signals were recorded while the participants watched the 2 h long Chinese-dubbed  
395 audio-visual movie “Forrest Gump”. The dataset provided a versatile resource for  
396 studying information processing in real-life contexts. First, MEG data could be  
397 independently used to study the neural dynamics of sensory processing and higher-  
398 level cognitive functions under real-life conditions. Second, as a *studyforrest*  
399 extension, the dataset could be integrated with publicly available fMRI data from the  
400 *studyforrest* project. The fusion of fMRI and MEG may shed new light on the  
401 relationship between spatially localized networks observed in fMRI and the MEG-  
402 derived temporal dynamics. Moreover, our massive MEG recordings enable the direct  
403 training of DNNs with neural activity patterns. In contrast to the DNNs that were  
404 usually trained with stimuli without referring to any neural representation, this kind of  
405 brain-constrained DNNs would act more like the human brain and generalize well  
406 across many tasks<sup>35,36</sup>.

407 Despite the importance of the aforementioned dataset as an extension of the  
408 *studyforrest* dataset in studying the spatiotemporal dynamics underlying cognitive  
409 processing in real-life contexts, the limitations should be acknowledged. First, the  
410 participants in our MEG data did not overlap with that in the *studyforrest* project.  
411 Therefore, the fMRI-MEG fusion can be only performed at the group level (i.e.,  
412 across participants) instead of the individual level (i.e., within participants). This may  
413 make it unable to study the individual differences in the coupling between spatially  
414 localized networks and temporal dynamics. Second, the dubbed languages used in our  
415 dataset and the *studyforrest* project were radically different, thus limiting the  
416 application of the data in examining spatiotemporal dynamics of brain activity  
417 underlying auditory and language. In addition, caution should be taken with timing  
418 differences between the stimuli in the MEG and fMRI data. Considering the lower  
419 sensitivity of fMRI signals to the exact timing than MEG signals, we recommend the  
420 use of MEG stimuli in fusing fMRI and MEG data.

421

## 422 Code Availability

423 All custom codes for data preprocessing and technical validation are available  
424 at [https://github.com/BNUCNL/MEG\\_Gump](https://github.com/BNUCNL/MEG_Gump). Preprocessing was performed using



425 MNE-BIDS (<https://mne.tools/stable/index.html>), MNE  
426 ([https://mne.tools/stable/install/mne\\_python.html](https://mne.tools/stable/install/mne_python.html)), fMRIPrep  
427 (<https://fmriprep.org/en/stable/>), pydeface (<https://github.com/poldracklab/pydeface>),  
428 and dcm2niix (<https://github.com/rordenlab/dcm2niix>).  
429

### 430 **Author contributions**

431 X.L. conceived, performed the study, and wrote the manuscript. Y.D. performed  
432 the study. H.X. contributed to the data collection. Z.Z. conceived, supervised the study  
433 and wrote the manuscript.

434

### 435 **References**

- 436 1. Sonkusare, S., Breakspear, M. & Guo, C. Naturalistic Stimuli in Neuroscience:  
437 Critically Acclaimed. *Trends in Cognitive Sciences* **23**, 699–714 (2019).
- 438 2. Jääskeläinen, I. P., Sams, M., Glerean, E. & Ahveninen, J. Movies and narratives as  
439 naturalistic stimuli in neuroimaging. *NeuroImage* **224**, 117445 (2021).
- 440 3. Wen, H. *et al.* Neural Encoding and Decoding with Deep Learning for Dynamic  
441 Natural Vision. *Cerebral Cortex* **28**, 4136–4160 (2018).
- 442 4. Shen, G., Horikawa, T., Majima, K. & Kamitani, Y. Deep image reconstruction from  
443 human brain activity. *PLOS Computational Biology* **15**, e1006633 (2019).
- 444 5. Güçlü, U. & van Gerven, M. A. J. Increasingly complex representations of natural  
445 movies across the dorsal stream are shared between subjects. *NeuroImage* **145**, 329–  
446 336 (2017).
- 447 6. Cichy, R. M. *et al.* The Algonauts Project 2021 Challenge: How the Human Brain  
448 Makes Sense of a World in Motion. *arXiv:2104.13714 [cs, q-bio]* (2021).
- 449 7. Hanke, M. *et al.* A high-resolution 7-Tesla fMRI dataset from complex natural  
450 stimulation with an audio movie. *Scientific Data* **1**, sdata20143 (2014).

- 451 8. Hanke, M. *et al.* A studyforrest extension, simultaneous fMRI and eye gaze  
452 recordings during prolonged natural stimulation. *Scientific Data* **3**, 160092 (2016).
- 453 9. Liu, X., Zhen, Z., Yang, A., Bai, H. & Liu, J. A manually denoised audio-visual  
454 movie watching fMRI dataset for the studyforrest project. *Sci Data* **6**, 295 (2019).
- 455 10. Aliko, S., Huang, J., Gheorghiu, F., Meliss, S. & Skipper, J. I. A naturalistic  
456 neuroimaging database for understanding the brain using ecological stimuli.  
457 *Scientific Data* **7**, 347 (2020).
- 458 11. Visconti di Oleggio Castello, M., Chauhan, V., Jiahui, G. & Gobbin, M. I. An  
459 fMRI dataset in response to “The Grand Budapest Hotel”, a socially-rich, naturalistic  
460 movie. *Scientific Data* **7**, 383 (2020).
- 461 12. Chang, W.-T. *et al.* Combined MEG and EEG show reliable patterns of  
462 electromagnetic brain activity during natural viewing. *Neuroimage* **114**, 49–56  
463 (2015).
- 464 13. Betti, V. *et al.* Natural Scenes Viewing Alters the Dynamics of Functional  
465 Connectivity in the Human Brain. *Neuron* **79**, 782–797 (2013).
- 466 14. Lankinen, K., Saari, J., Hari, R. & Koskinen, M. Intersubject consistency of  
467 cortical MEG signals during movie viewing. *NeuroImage* **92**, 217–224 (2014).
- 468 15. Lankinen, K. *et al.* Consistency and similarity of MEG- and fMRI-signal time  
469 courses during movie viewing. *NeuroImage* **173**, 361–369 (2018).
- 470 16. Nunes, A. S. *et al.* Neuromagnetic activation and oscillatory dynamics of  
471 stimulus-locked processing during naturalistic viewing. *NeuroImage* **216**, 116414  
472 (2020).
- 473 17. Kleiner, M. *et al.* What’s New in Psychtoolbox-3? *Perception* **36**, 1–16 (2007).
- 474 18. Gramfort, A. MEG and EEG data analysis with MNE-Python. *Front. Neurosci.*  
475 **7**, (2013).

- 476 19. Esteban, O. *et al.* fMRIPrep: a robust preprocessing pipeline for functional MRI.  
477 *Nature Methods* **16**, 111–116 (2019).
- 478 20. Tustison, N. J. *et al.* N4ITK: Improved N3 Bias Correction. *IEEE Trans. Med.*  
479 *Imaging* **29**, 1310–1320 (2010).
- 480 21. Dale, A. M., Fischl, B. & Sereno, M. I. Cortical Surface-Based Analysis.  
481 *NeuroImage* **16** (1999).
- 482 22. Liu, X., Dai, Y., Xie, H. & Zhen, Z. ForrestGump-MEG. *OpenNeuro* (2021)  
483 doi:10.18112/openneuro.ds003633.v1.0.1.
- 484 23. Niso, G. *et al.* MEG-BIDS, the brain imaging data structure extended to  
485 magnetoencephalography. *Sci Data* **5**, 180110 (2018).
- 486 24. Appelhoff, S. *et al.* MNE-BIDS: Organizing electrophysiological data into the  
487 BIDS format and facilitating their analysis. *JOSS* **4**, 1896 (2019).
- 488 25. Uno, T. *et al.* Dissociated Roles of the Inferior Frontal Gyrus and Superior  
489 Temporal Sulcus in Audiovisual Processing: Top-Down and Bottom-Up Mismatch  
490 Detection. *PLoS ONE* **10**, e0122580 (2015).
- 491 26. Chikara, R. K. & Ko, L.-W. Modulation of the Visual to Auditory Human  
492 Inhibitory Brain Network: An EEG Dipole Source Localization Study. *Brain*  
493 *Sciences* **9**, 216 (2019).
- 494 27. Ferraro, S. *et al.* Stereotactic electroencephalography in humans reveals  
495 multisensory signal in early visual and auditory cortices. *Cortex* **126**, 253–264 (2020).
- 496 28. Lowe, M. J., Mock, B. J. & Sorenson, J. A. Functional Connectivity in Single  
497 and Multislice Echoplanar Imaging Using Resting-State Fluctuations. *NeuroImage*  
498 **7**, 119–132 (1998).
- 499 29. Mancuso, L. *et al.* The homotopic connectivity of the functional brain: a meta-  
500 analytic approach. *Sci Rep* **9**, 3346 (2019).

- 501 30. Hasson, U., Nir, Y., Levy, I., Fuhrmann, G. & Malach, R. Intersubject  
502 synchronization of cortical activity during natural vision. *science* **303**, 1634–1640  
503 (2004).
- 504 31. Hari, R. & Salmelin, R. Magnetoencephalography: From SQUIDs to  
505 neuroscience. *NeuroImage* **61**, 386–396 (2012).
- 506 32. Hasson, U. *et al.* Neurocinematics: The neuroscience of film. *Projections* **2**, 1–  
507 26 (2008).
- 508 33. Thiede, A., Glerean, E., Kujala, T. & Parkkonen, L. Atypical MEG inter-subject  
509 correlation during listening to continuous natural speech in dyslexia. *NeuroImage*  
510 **216**, 116799 (2020).
- 511 34. Puschmann, S., Regev, M., Baillet, S. & Zatorre, R. J. MEG Intersubject Phase  
512 Locking of Stimulus-Driven Activity during Naturalistic Speech Listening  
513 Correlates with Musical Training. *J. Neurosci.* **41**, 2713–2722 (2021).
- 514 35. Fong, R. C., Scheirer, W. J. & Cox, D. D. Using human brain activity to guide  
515 machine learning. *Sci Rep* **8**, 5397 (2018).
- 516 36. Spampinato, C. *et al.* Deep Learning Human Mind for Automated Visual  
517 Classification. *arXiv:1609.00344 [cs]* (2019).
- 518
- 519

520 **Supplementary materials**

521

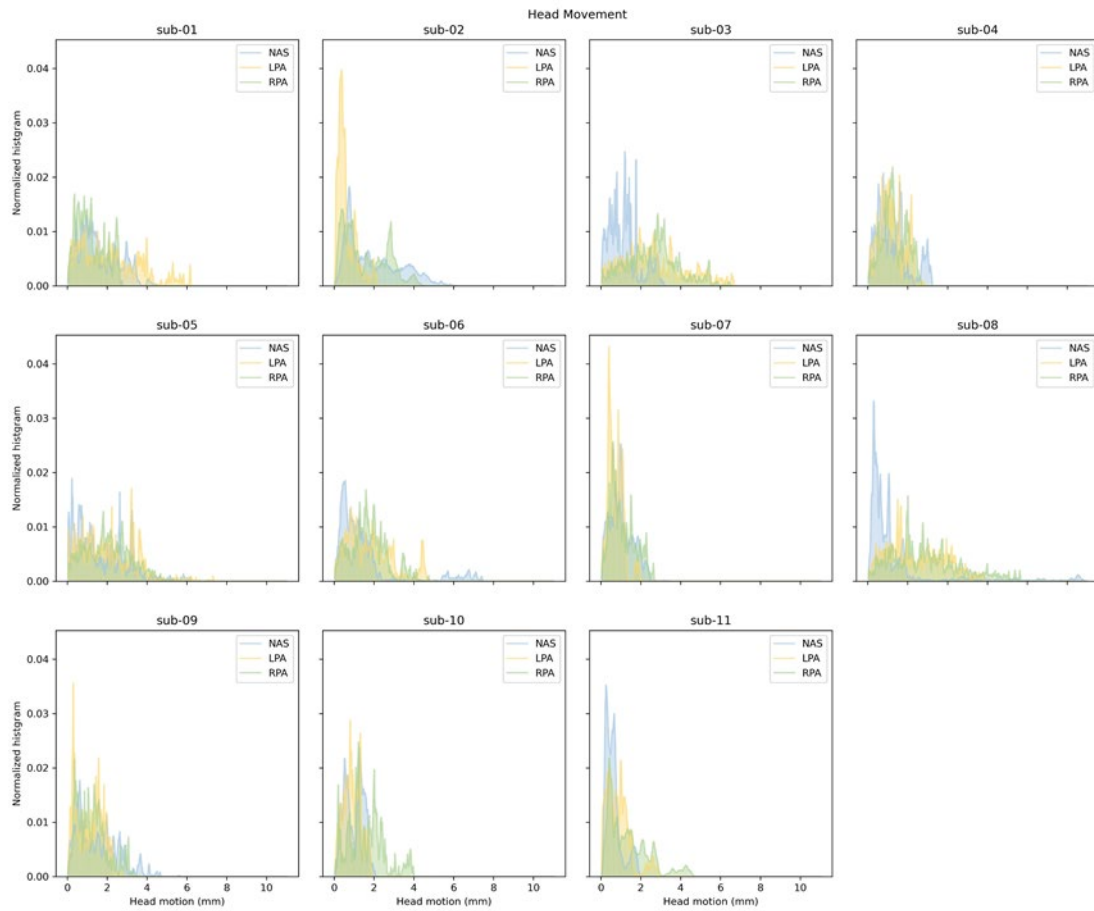

522

523 **Supplementary Figure 1.** Head motion magnitude from each individual participant. The  
524 density histogram of motion magnitude calculated for three fiducials (NAS, LPA, RPA)  
525 were plotted for all samples, across all runs for each participant.

526

# Consent and questionnaire

Data collection

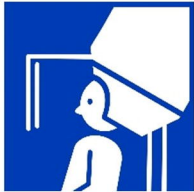

**MEG Session**  
Audiovisual movie watching  
8 runs

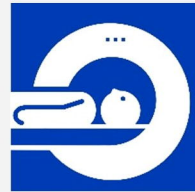

**MRI Session**  
T1w imaging

 Input    Processing    Output

Data preprocessing

raw MEG data

Bad channel detection  
1 Hz High-pass filtering  
ICA artifacts removal

Preprocessed MEG data  
and derivatives

MNE toolbox

raw T1w MRI data

Volume preprocessing  
Surface reconstruction  
and preprocessing

Preprocessed volume and  
surface data in  
native and standard space

fMRIPrep

coregistration

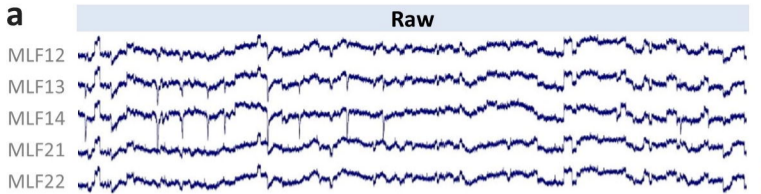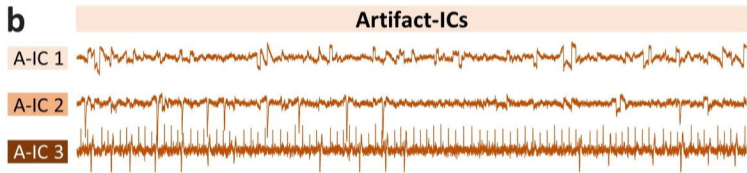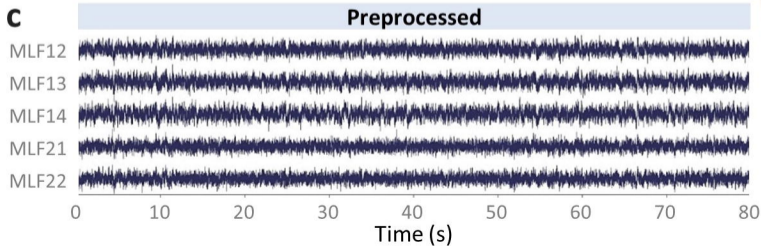

Eye blink

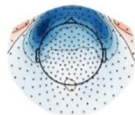

Eye movement

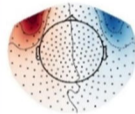

Heartbeat

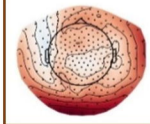

**a**

```

./
├── dataset_description.json
├── participants.json
├── participants.tsv
├── README
├── code/
├── sub-01/
├── sub-xx/
├── sub-emptyroom/
└── derivatives/

```

**b**

```

./
├── ...
├── sub-01/
│   ├── ses-movie/
│   │   ├── anat/
│   │   │   ├── sub-01_ses-movie_T1w.json
│   │   │   └── sub-01_ses-movie_T1w.nii.gz
│   │   └── meg/
│   │       ├── sub-01_ses-movie_coordsystem.json
│   │       ├── sub-01_ses-movie_task-movie_run-01_channels.tsv
│   │       ├── sub-01_ses-movie_task-movie_run-01_events.tsv
│   │       ├── sub-01_ses-movie_task-movie_run-01_meg.ds
│   │       ├── sub-01_ses-movie_task-movie_run-01_meg.json
│   │       └── ...
│   │       └── sub-01_ses-movie_scans.tsv
│   └── sub-xx/
│   └── sub-emptyroom/
│       ├── ses-20190429/
│       │   ├── meg/
│       │   │   ├── sub-emptyroom_ses-20190429_task-noise_channels.tsv
│       │   │   ├── sub-emptyroom_ses-20190429_task-noise_meg.ds
│       │   │   ├── sub-emptyroom_ses-20190429_task-noise_meg.json
│       │   │   └── ...
│       │   └── sub-emptyroom_ses-20190429_scans.tsv
│       └── ses-xxxxxxx/

```

**c**

```

./
├── ...
├── derivatives/
│   ├── preproc_meg-mne_mri-fmriprep/
│   │   ├── dataset_description.json
│   │   ├── desc-aparcaseg_dseg.tsv
│   │   ├── desc-aseg_dseg.tsv
│   │   ├── participants.json
│   │   ├── participants.tsv
│   │   └── sourcedata/
│   │       └── freesurfer/
│   │           ├── sub-01/
│   │           │   ├── bem/
│   │           │   │   ├── brain.surf
│   │           │   │   ├── inner_skull.surf
│   │           │   │   ├── outer_skin.surf
│   │           │   │   ├── outer_skull.surf
│   │           │   │   ├── sub-01-fiducials.fif
│   │           │   │   ├── sub-01-head-dense.fif
│   │           │   │   ├── sub-01-head.fif
│   │           │   │   ├── sub-01-head-medium.fif
│   │           │   │   ├── sub-01-head-sparse.fif
│   │           │   │   └── ...
│   │           │   ├── mri/
│   │           │   ├── surf/
│   │           │   └── ...
│   │           └── sub-xx/
│   └── sub-01/
│       ├── ses-movie/
│       │   ├── anat/
│       │   │   ├── sub-01_ses-movie_desc-preproc_T1w.nii.gz
│       │   │   ├── sub-01_ses-movie_hemi-L_inflated.surf.gii
│       │   │   ├── sub-01_ses-movie_hemi-L_midthickness.surf.gii
│       │   │   ├── sub-01_ses-movie_hemi-L_pial.surf.gii
│       │   │   ├── sub-01_ses-movie_hemi-L_smoothwm.surf.gii
│       │   │   ├── sub-01_ses-movie_hemi-R_inflated.surf.gii
│       │   │   ├── sub-01_ses-movie_hemi-R_midthickness.surf.gii
│       │   │   ├── sub-01_ses-movie_hemi-R_pial.surf.gii
│       │   │   ├── sub-01_ses-movie_hemi-R_smoothwm.surf.gii
│       │   │   ├── sub-01_ses-movie_space-MNI152Nlin2009cAsym_desc-preproc_T1w.nii.gz
│       │   │   ├── sub-01_ses-movie_space-MNI152Nlin6Asym_desc-preproc_T1w.nii.gz
│       │   │   └── ...
│       │   └── meg/
│       │       ├── sub-01_ses-movie_coordsystem.json
│       │       ├── sub-01_ses-movie_task-movie_run-01_channels.tsv
│       │       ├── sub-01_ses-movie_task-movie_run-01_decomposition.tsv
│       │       ├── sub-01_ses-movie_task-movie_run-01_events.tsv
│       │       ├── sub-01_ses-movie_task-movie_run-01_ica.fif.gz
│       │       ├── sub-01_ses-movie_task-movie_run-01_meg.fif
│       │       ├── sub-01_ses-movie_task-movie_run-01_meg.json
│       │       └── ...
│       │       └── sub-01_ses-movie_task-movie_trans.fif
│       └── sub-01_ses-movie_scans.tsv

```



**NAS**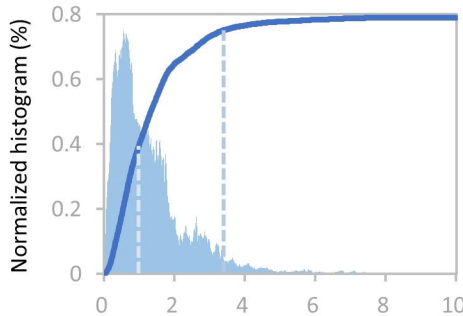**LPA**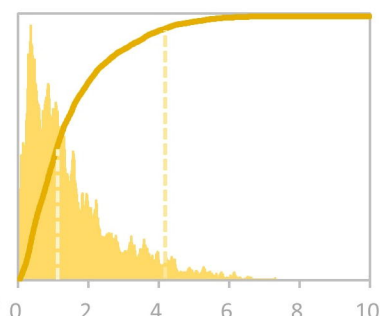**RPA**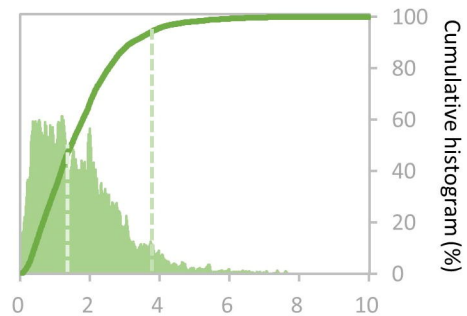

Head motion (mm)

**occipital**

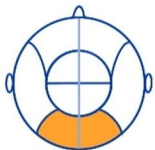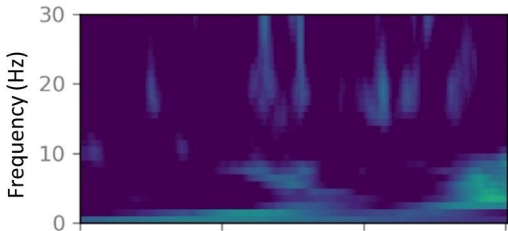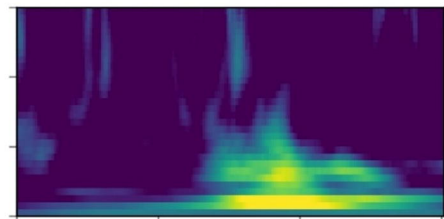

**temporal**

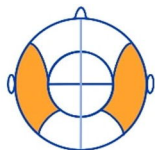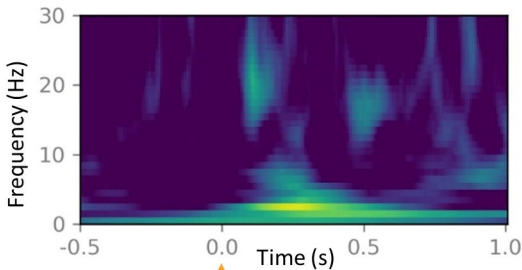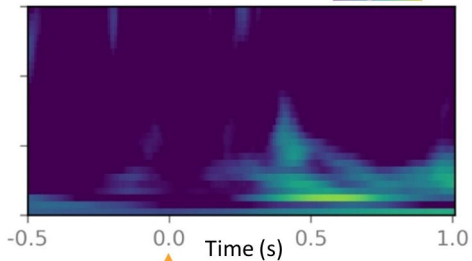

**visual**

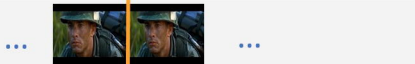

**audio**

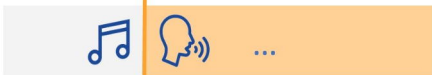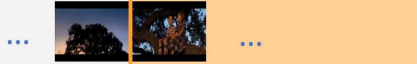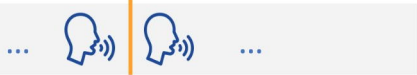

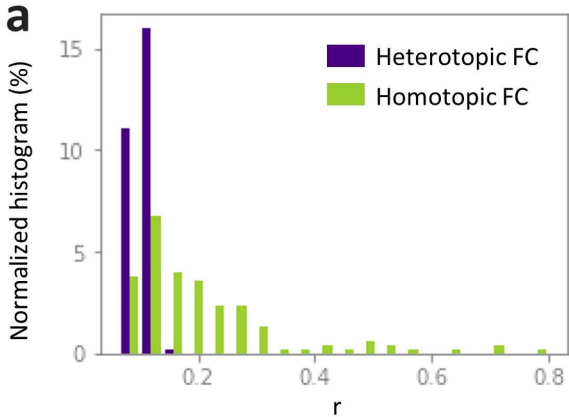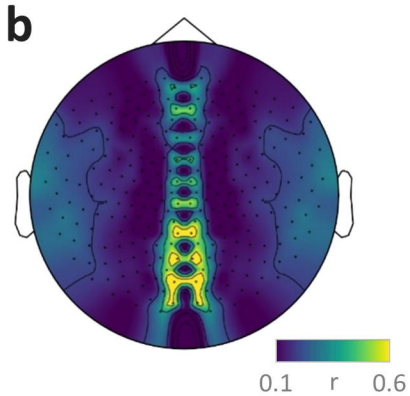

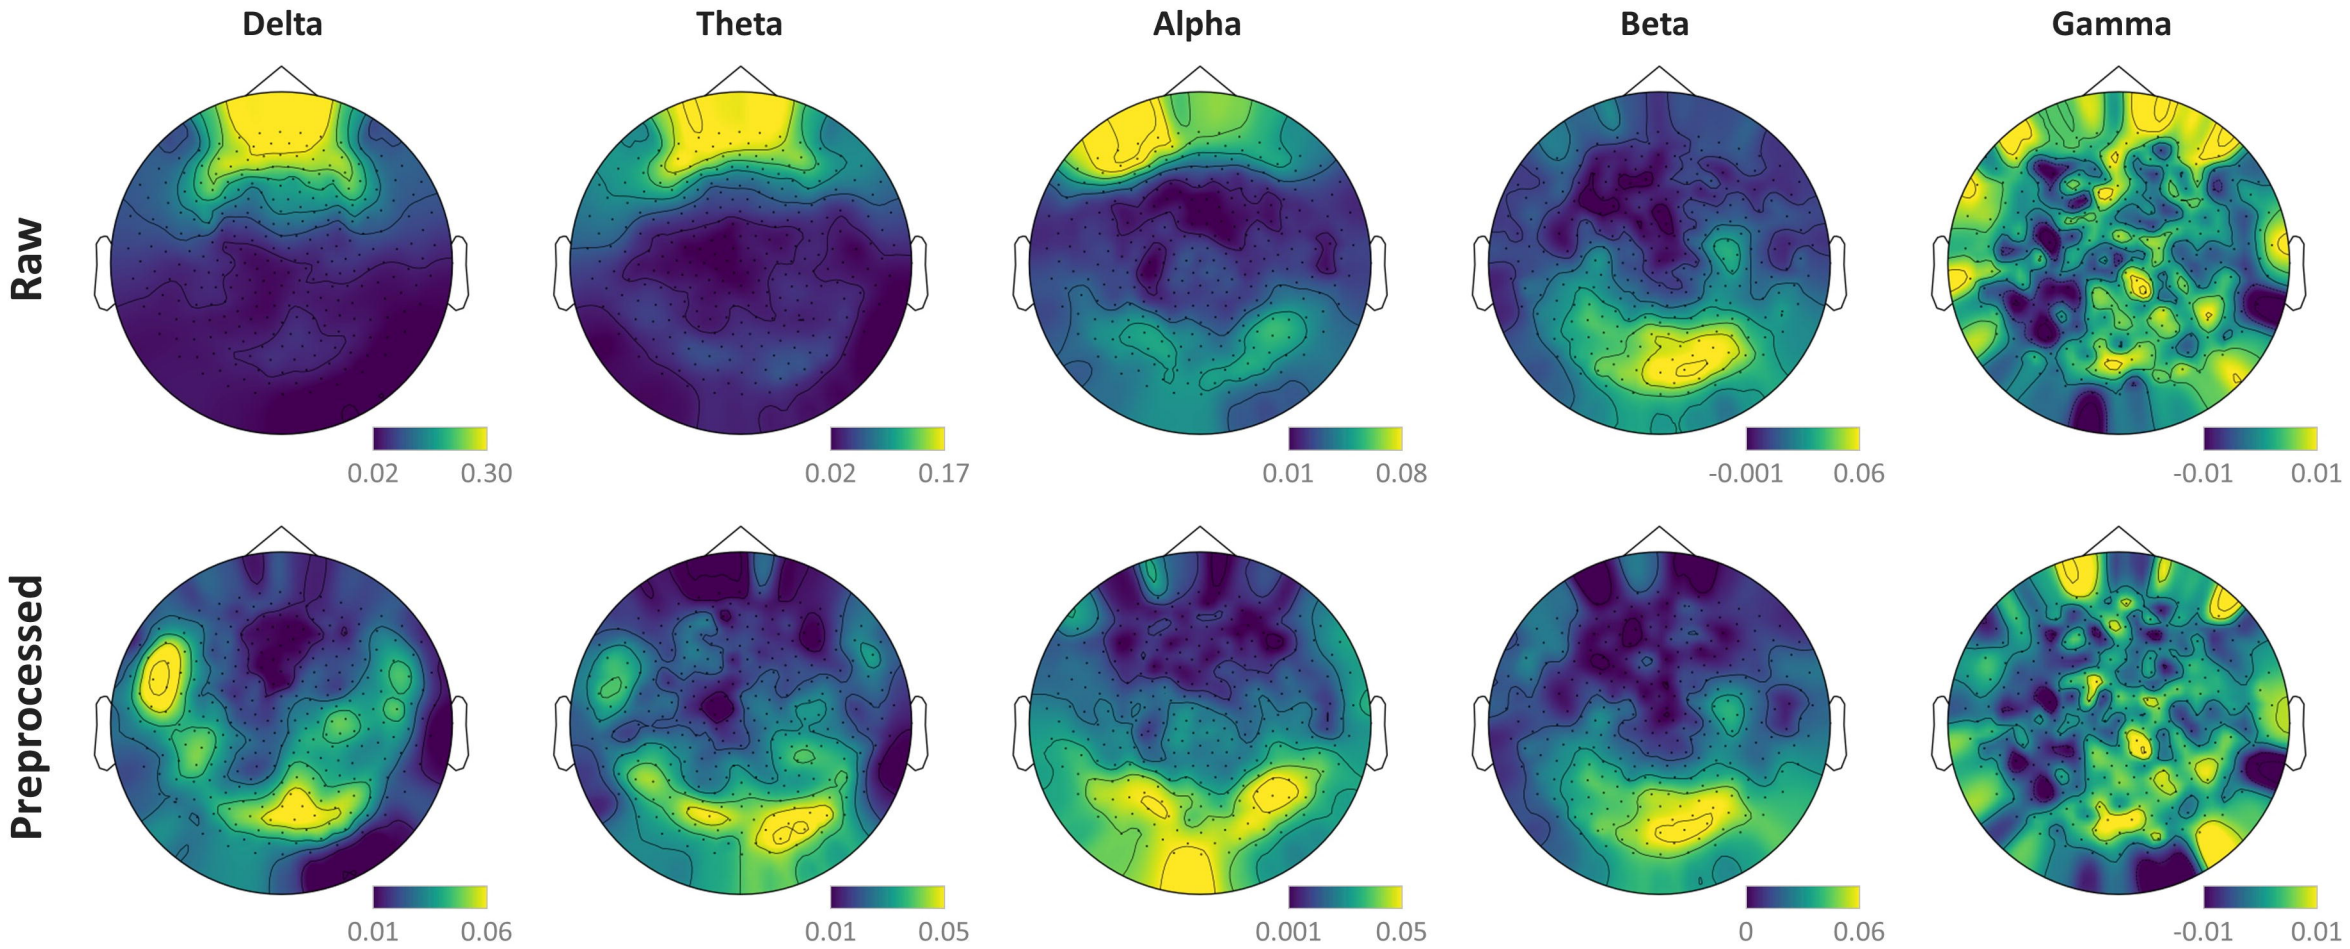

Source: https://www.biorxiv.org/content/10.1101/2021.06.04.446837v1.full.pdf
